# Supplementary material
Source: PubMed Central journal article supplement (PMC2526351)
Supplement: NIHMS60546-supplement-si20050425_055.pdf [file NIHMS60546-supplement-si20050425_055.pdf]

## Supporting Information

### **A Facile Method to Transform trans-4-Carboxy-3,4-dihydro-3-phenyl-1(2H)- isoquinolones to Indeno[1,2-c]isoquinolines**

Xiangshu Xiao and Mark Cushman\*

*Department of Medicinal Chemistry and Molecular Pharmacology and the Purdue  
Cancer Center, School of Pharmacy and Pharmaceutical Sciences, Purdue University,  
West Lafayette, IN 47907, USA*

|                                          |    |
|------------------------------------------|----|
| Title page                               | S1 |
| <sup>1</sup> H NMR of compound <b>4</b>  | S2 |
| <sup>1</sup> H NMR of compound <b>11</b> | S3 |
| <sup>1</sup> H NMR of compound <b>12</b> | S4 |
| ORTEP drawing of compound <b>10</b>      | S5 |

---

Corresponding Author: Phone number: 765-494-1465; fax number: 765-494-6790, e-mail: [cushman@pharmacy.purdue.edu](mailto:cushman@pharmacy.purdue.edu)

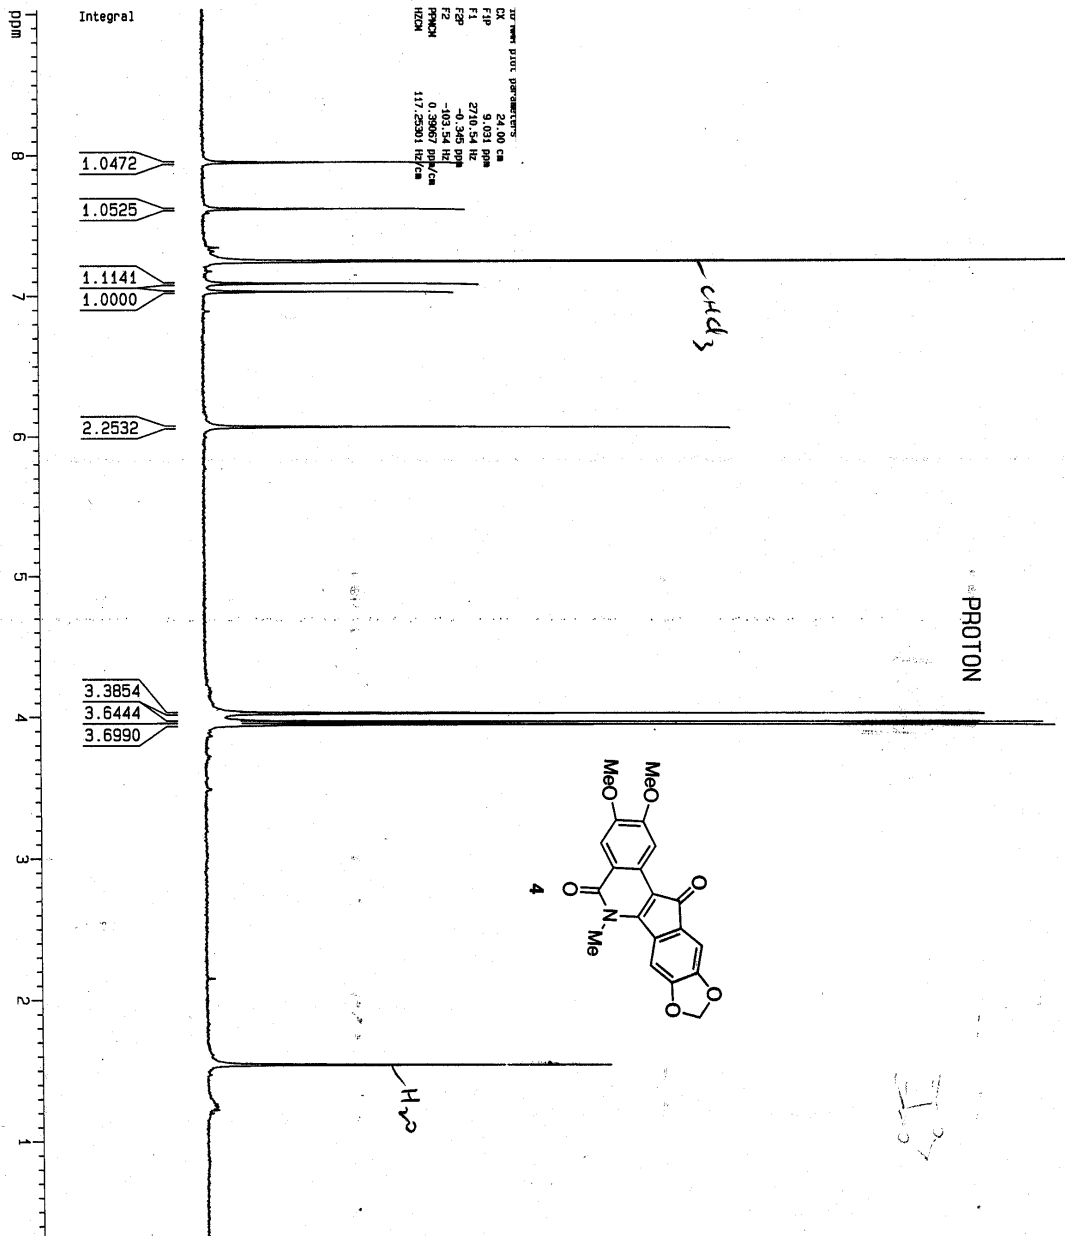

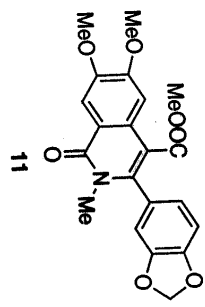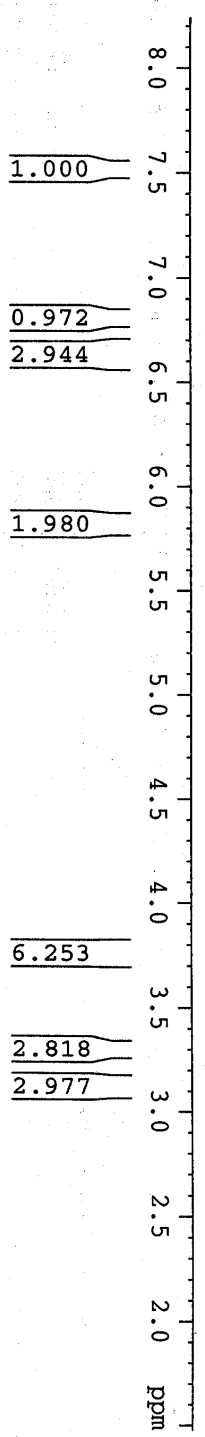

Current Data Parameters  
 NAME: x09130-55  
 EXNO: 1  
 RECNO: 1  
 P2 - Acquisition Parameters  
 Date\_ Time: 01/17/05 17:46  
 Time: 01:17:46  
 PROBHD: 5 mm QNP 1H/13  
 PULPROG: zgpg30  
 SOLVENT: CDCl3  
 NS: 4  
 DS: 4  
 SWH: 4584.204 Hz  
 FIDRES: 0.238597 Hz  
 AQ: 0.041288 sec  
 RG: 128  
 DW: 111.000 usec  
 DE: 1.0000000 usec  
 TE: 300.2 K  
 D1: 1.00000000 sec  
 SFO1: 300.1343785 MHz  
 NUC13: 13  
 P2 - Processing parameters  
 SI: 300.133982 MHz  
 MW: 81  
 LB: 0.30 Hz  
 GB: 0  
 CB: 1.00  
 TD: 4  
 F2 - NMR plot parameters  
 CA: 15.000 ppm  
 PF: 492.00 Hz  
 SI: 300.133982 MHz  
 F2: -500.840 Hz  
 F2A: 500.840 Hz  
 NUC2: 13C  
 FREQ2: 225.10004 MHz

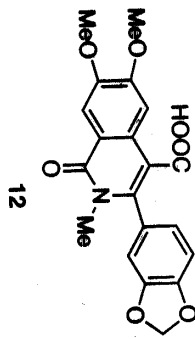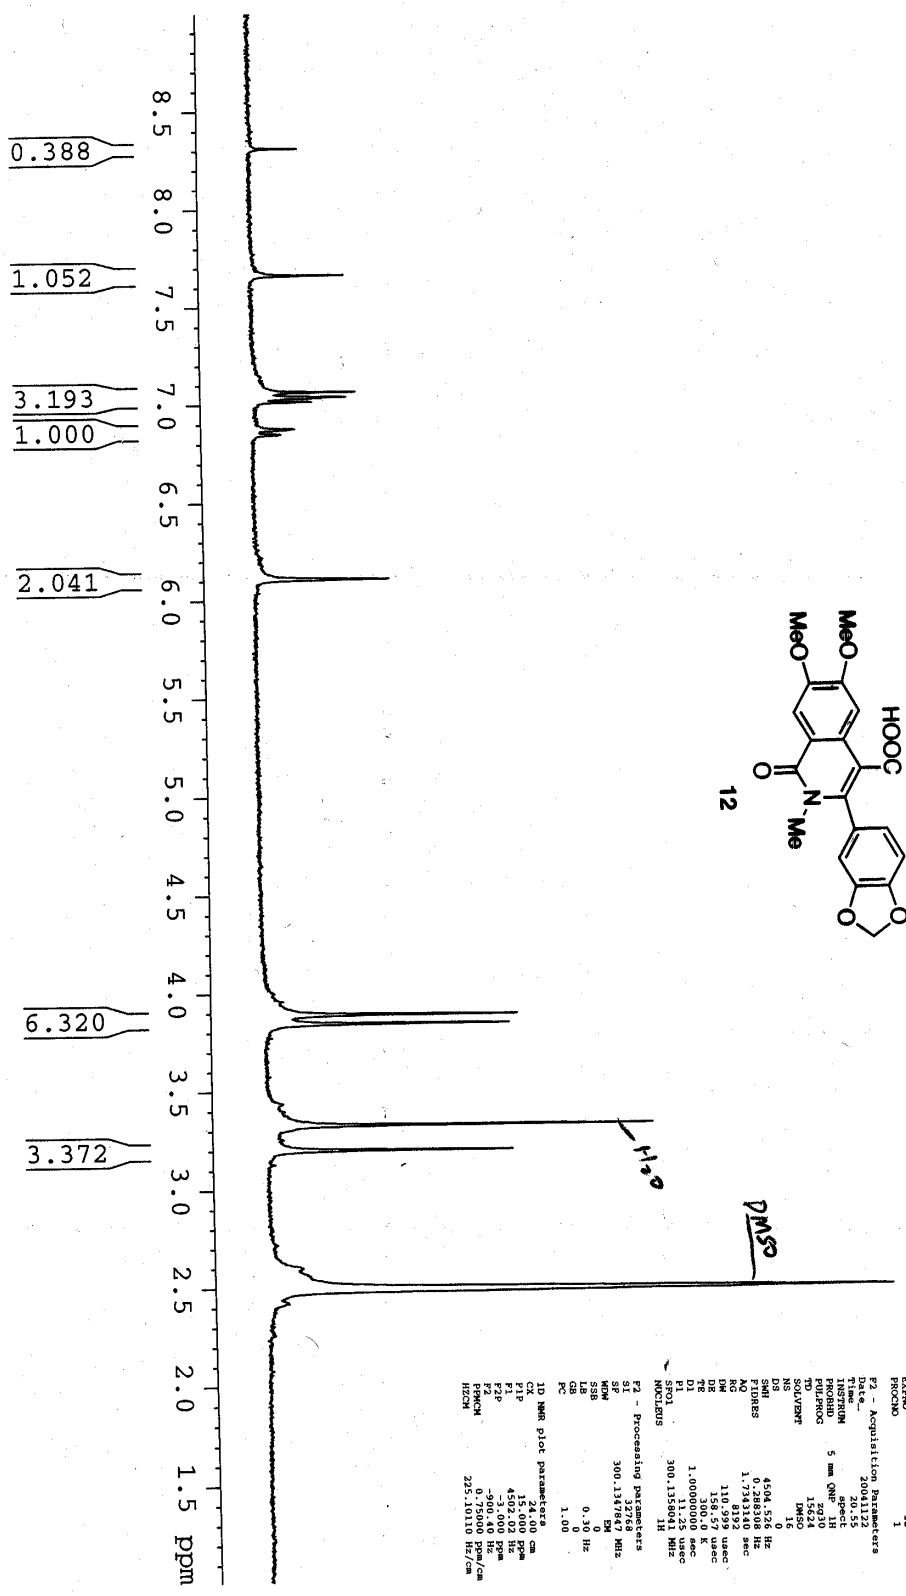

Current Data Parameters  
 NAME: xx9485-09  
 RECDNO: 1  
 F2 - Acquisition Parameters  
 File Name: 20041122  
 Time: 20.55  
 INSTRUM: spect  
 PROBNM: 5 mm QNP 1H  
 PULPROG: zgpg30  
 TOUGVIRT: 120  
 SOLVENT: DMSO  
 NS: 16  
 DS: 4  
 DSBL: 4504.526 Hz  
 FIDRES: 0.2883108 Hz  
 AQ: 1.7588192 sec  
 RG: 327.68  
 DM: 110.999 usec  
 DE: 300.0 K  
 D1: 1.00000000 sec  
 P1: 300.1356041 MHz  
 P2: 300.1356041 MHz  
 NUC1: 1H  
 NUC2: 13C  
 F2 - Processing parameters  
 SI: 327.68 MHz  
 SF: 300.1356041 MHz  
 W: 0 Hz  
 SSB: 0 Hz  
 LB: 0 Hz  
 GB: 0 Hz  
 PC: 1.00  
 ID NMR plot parameters  
 CX: 24.00 cm  
 P1: 4502.00 Hz  
 F2P: -3.000 ppm  
 F2: 75000 ppm/cm  
 HZCM: 225.10110 Hz/cm

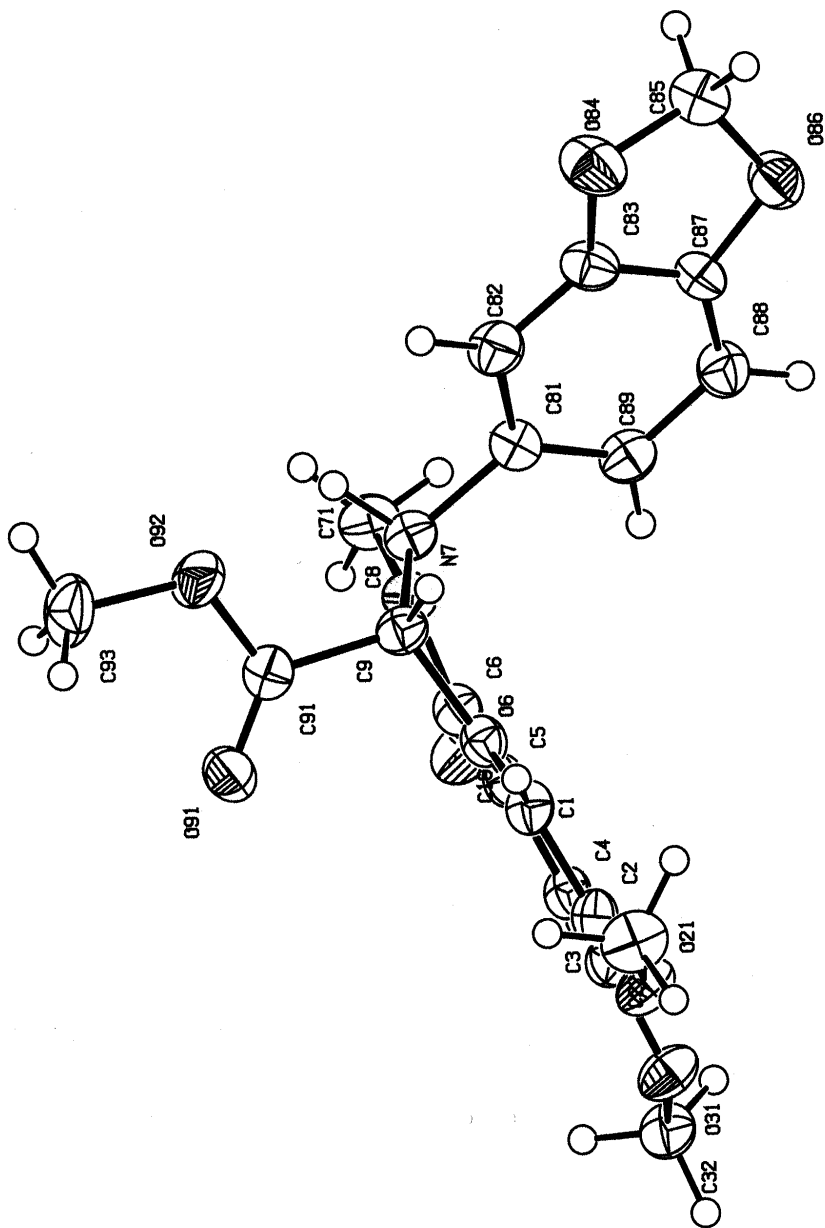

ORTEP drawing of **10**.
